# Supplementary material
Source: PubMed Central journal article supplement (PMC5380226)
Supplement: NIHMS854310-supplement-supplemental_files.pdf [file NIHMS854310-supplement-supplemental_files.pdf]

# Supplementary Figure S1

**a**

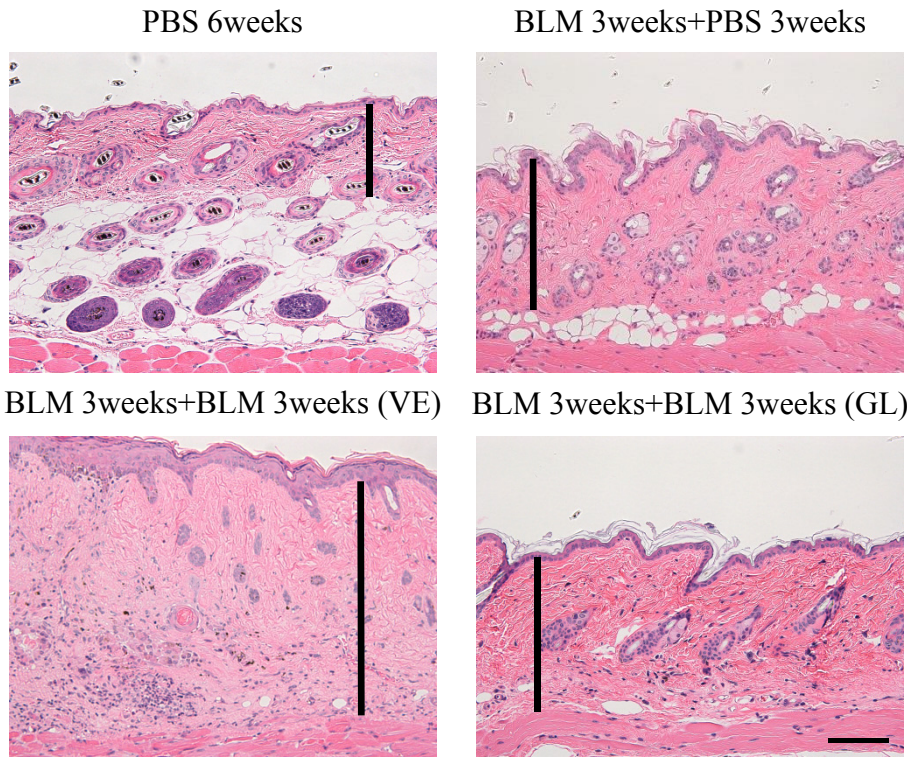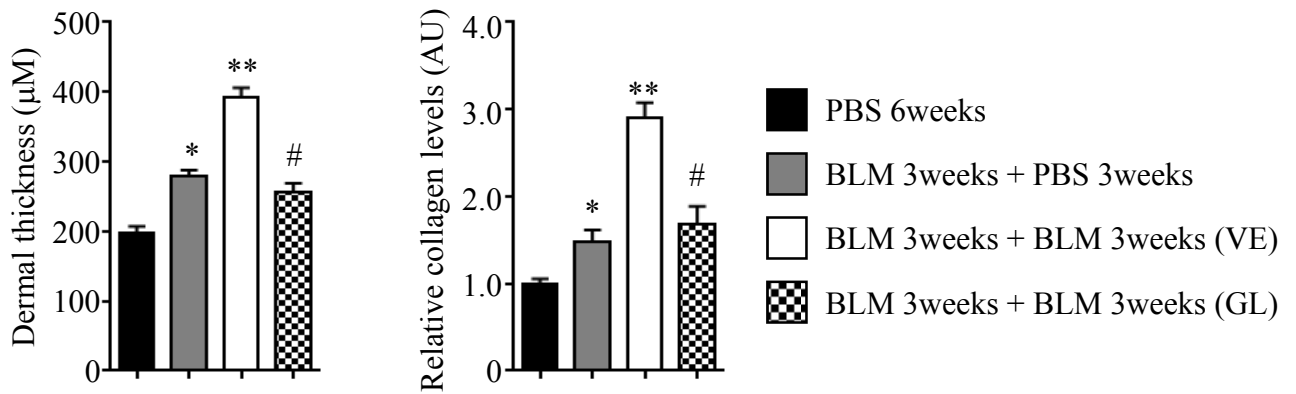

**b**

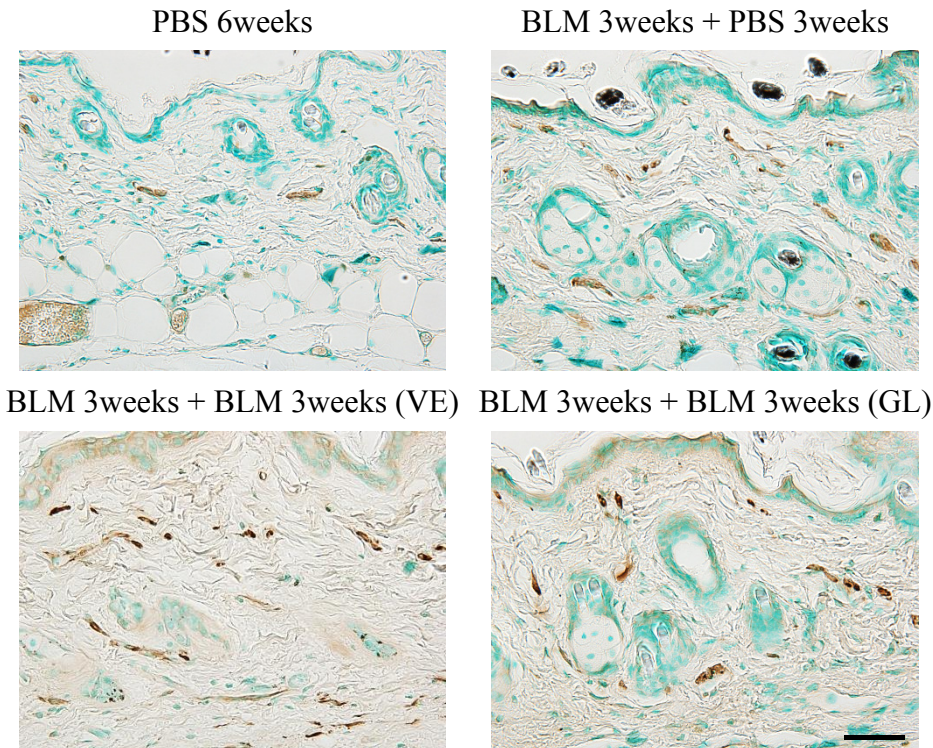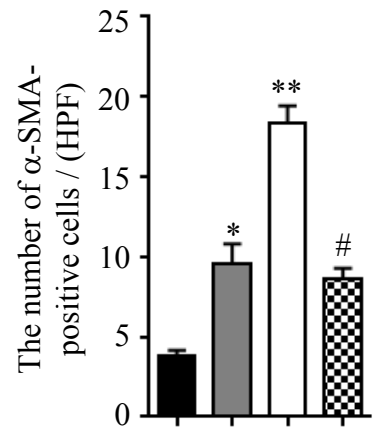

# Supplementary Figure S2

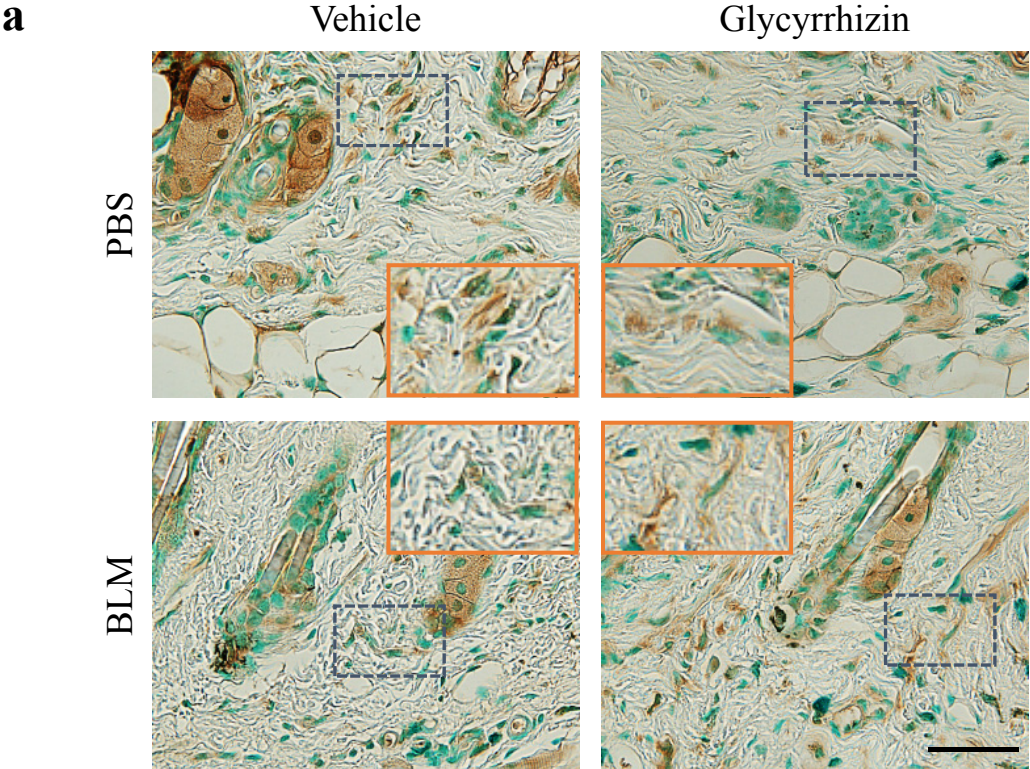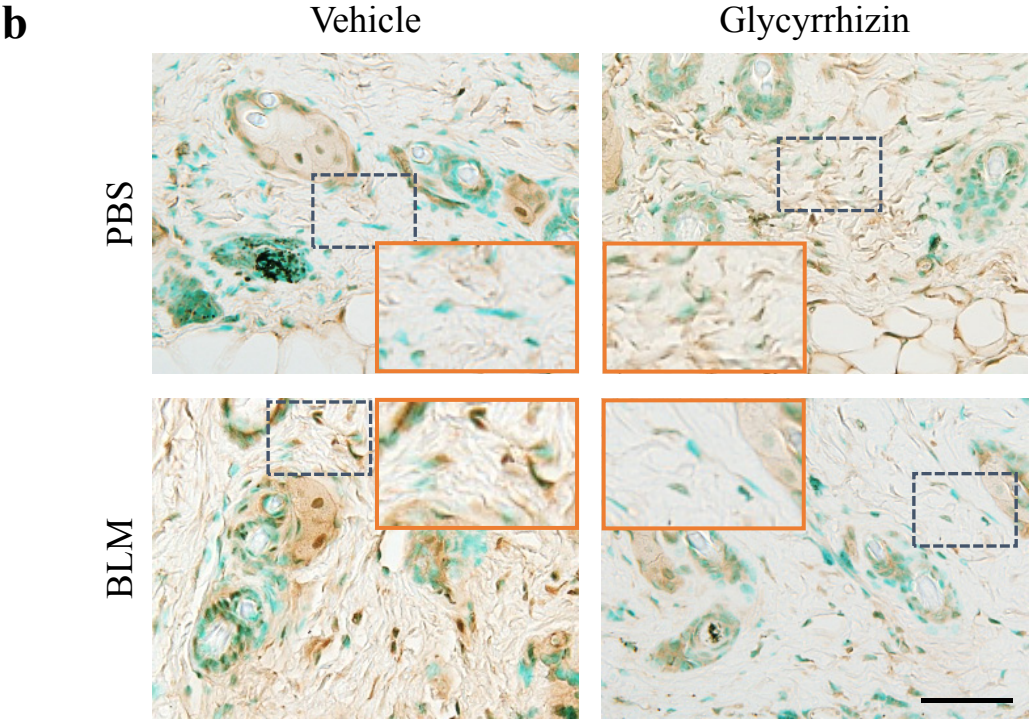

# Supplementary Figure S3

**a**

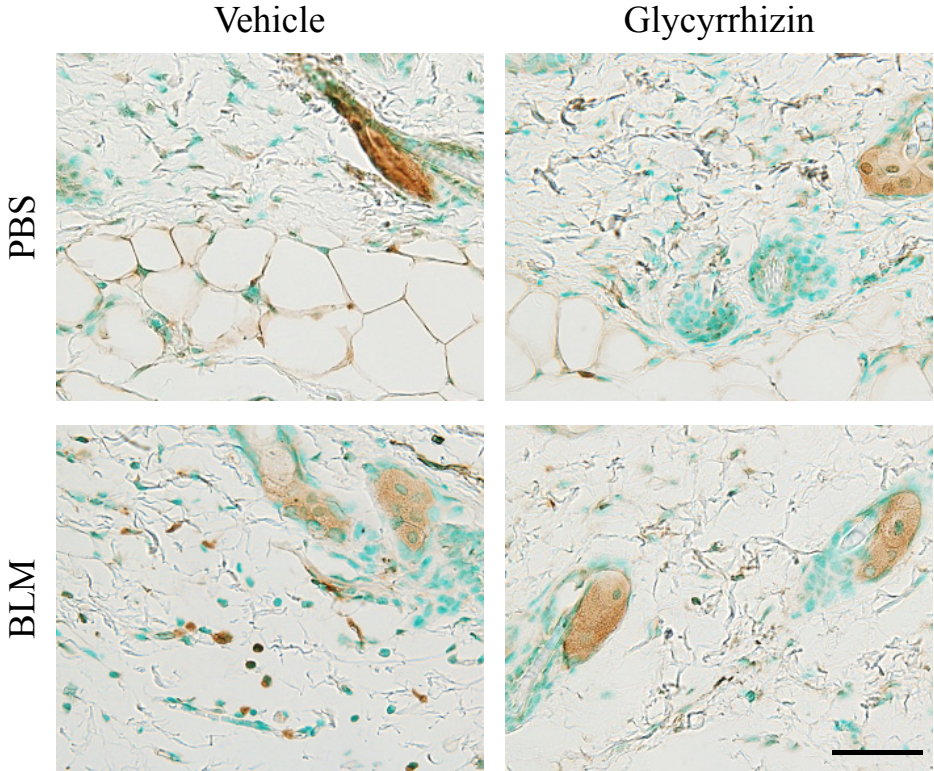

**b**

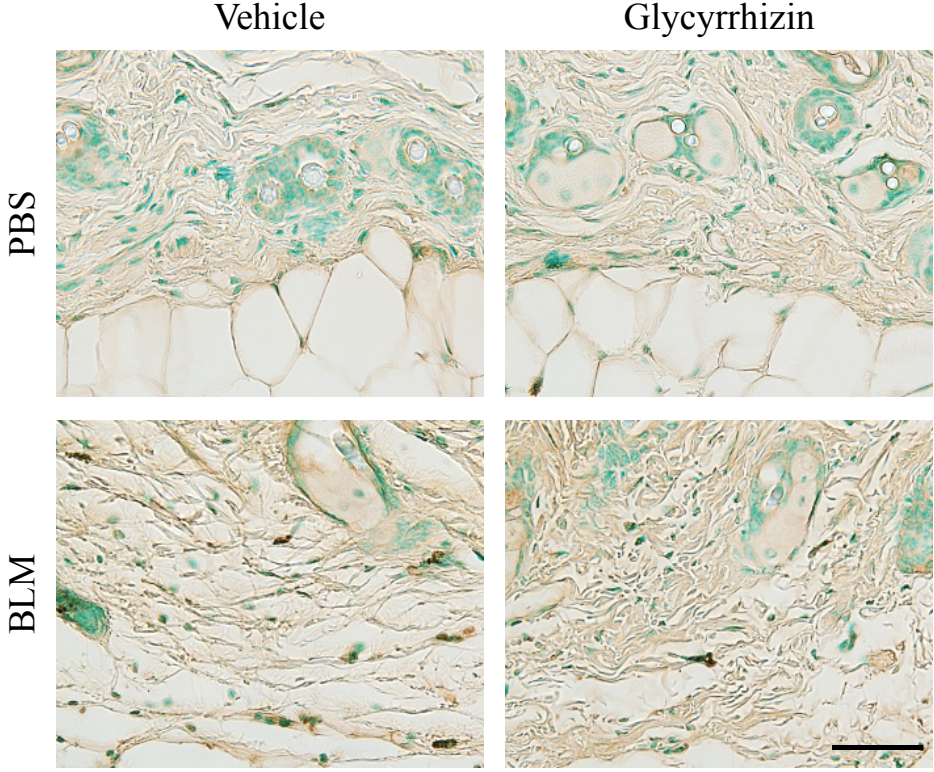

# Supplementary Figure S4

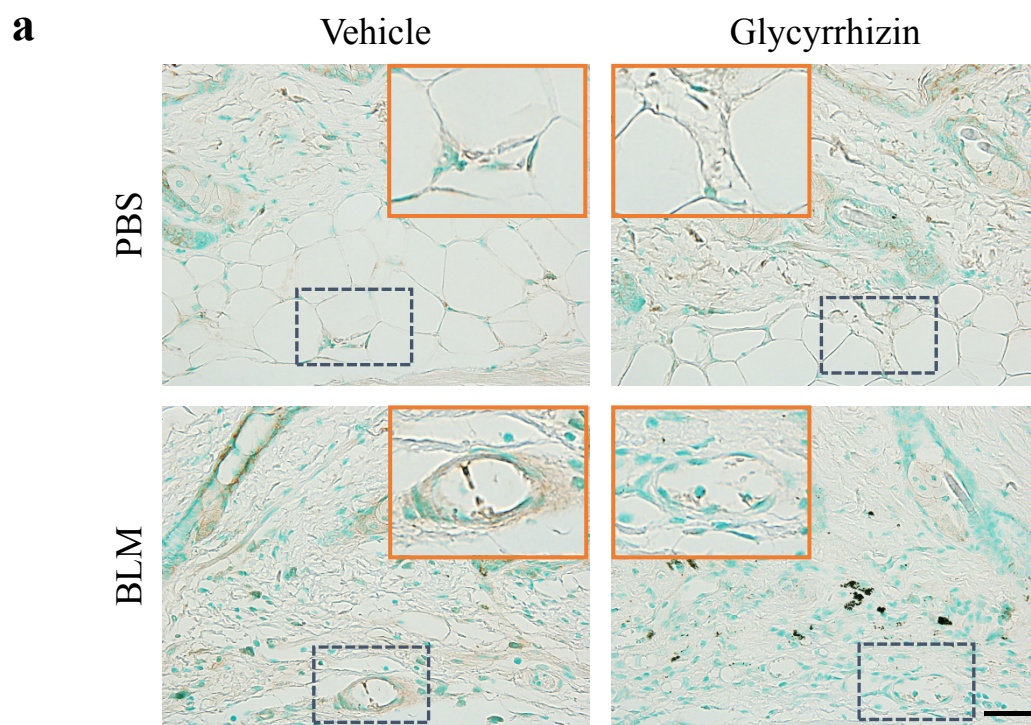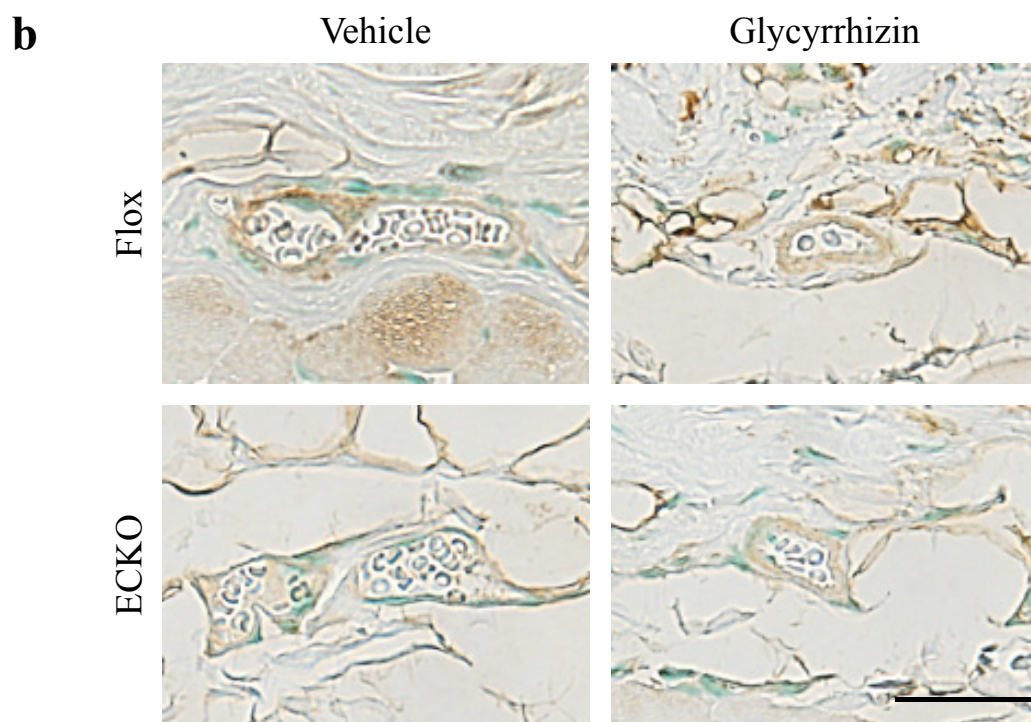

**Supplementary Table 1. Sequences of primers for qRT-PCR**

| Genes         | Primer sequences |                                 |
|---------------|------------------|---------------------------------|
| <i>Col1a1</i> | Forward:         | 5'-GCCAAGAAGACATCCCTGAAG-3'     |
|               | Reverse:         | 5'-TGTGGCAGATACAGATCAAGC-3'     |
| <i>Col1a2</i> | Forward:         | 5'-GGAGGGAACGGTCCACGAT-3'       |
|               | Reverse:         | 5'-GAGTCCGCGTATCCACAA-3'        |
| <i>Col3a1</i> | Forward:         | 5'-TTTGTGCAAGTGGAACCTG-3'       |
|               | Reverse:         | 5'-TGGACTGCTGTGCCAAAATA-3'      |
| <i>Mmp13</i>  | Forward:         | 5'-TGATGGCACTGCTGACATCAT-3'     |
|               | Reverse:         | 5'-TGTAGCCTTTGGAAGCTGCTT-3'     |
| <i>Ctgf</i>   | Forward:         | 5'-GTGCCAGAACGCACACTG-3'        |
|               | Reverse:         | 5'-CCCCGGTTACTCTCCAAA-3'        |
| <i>Tgfb1</i>  | Forward:         | 5'-GCAACATGTGGAAGCTCTACCAGAA-3' |
|               | Reverse:         | 5'-GACGTCAAAAGACAGCCACTCA-3'    |
| <i>Thbs1</i>  | Forward:         | 5'-TGGTAGCTGGAAATGTGGTG-3'      |
|               | Reverse:         | 5'-CAGGCACTTCTTTGCACTCA-3'      |
| <i>Itgav</i>  | Forward:         | 5'-GGTGTGGATCGAGCTGTCTT-3'      |
|               | Reverse:         | 5'-CAAGGCCAGCATTTACAGTG-3'      |
| <i>Itgb3</i>  | Forward:         | 5'-GTGGGAGGGCAGTCCTCTA-3'       |
|               | Reverse:         | 5'-CAGGATATCAGGACCCTTGG-3'      |
| <i>Itgb5</i>  | Forward:         | 5'-ACCTGCCAAGATGGCATATC-3'      |
|               | Reverse:         | 5'-CACGGACACTTCAAAGGATG-3'      |
| <i>Il1b</i>   | Forward:         | 5'-TTGACGGACCCCAAAAGAT-3'       |
|               | Reverse:         | 5'-GAAGCTGGATGCTCTCATCTG-3'     |
| <i>Il4</i>    | Forward:         | 5'-ACGGAGATGGATGTGCCAAACGTC-3'  |
|               | Reverse:         | 5'-CGAGTAATCCATTTGCATGATGC-3'   |
| <i>Il6</i>    | Forward:         | 5'-GATGGATGCTACCAAAGTGGAT-3'    |
|               | Reverse:         | 5'-CCAGGTAGCTATGGTACTCCAGA-3'   |
| <i>Arg1</i>   | Forward:         | 5'-CAGAAGAATGGAAGAGTCAG-3'      |
|               | Reverse:         | 5'-CAGATATGCAGGGAGTCACC-3'      |
| <i>Snail1</i> | Forward:         | 5'-CAACTATAGCGAGCTGCAGGA-3'     |
|               | Reverse:         | 5'-ACTTGGGGTACCAGGAGAGAGT-3'    |
| <i>Cad5</i>   | Forward:         | 5'-TCCTCTGCATCCTCACTATCACA-3'   |
|               | Reverse:         | 5'-GTAAGTGACCAACTGCTCGTGAAT-3'  |

|               |          |                                |
|---------------|----------|--------------------------------|
| <i>Pecam1</i> | Forward: | 5'-TCCCTGGGAGGTCGTCCAT-3'      |
|               | Reverse: | 5'-GAACAAGGCAGCGGGGTTTA-3'     |
| <i>Pdgfb</i>  | Forward: | 5'-CCCACAGTGGCTTTTCATTT-3'     |
|               | Reverse: | 5'-GTGGAGGAGCAGACTGAAGG-3'     |
| <i>Fli1</i>   | Forward: | 5'-ACTTGGCCAAATGGACGGGACTAT-3' |
|               | Reverse: | 5'-CCCGTAGTCAGGACTCCCG-3'      |
| <i>Gapdh</i>  | Forward: | 5'-CGTGTTCCTACCCCAATGT-3'      |
|               | Reverse: | 5'-TGTCATCATACTTGGCAGGTTTCT-3' |
